# Supplementary material
Source: PubMed Central journal article supplement (PMC7183187)
Supplement: pnas.1918254117.sapp.pdf [file pnas.1918254117.sapp.pdf]

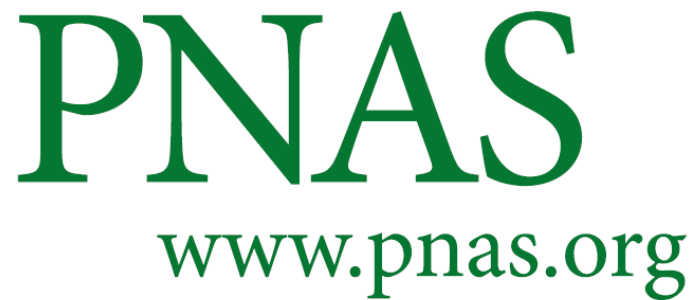

## Supplementary Information for

### **Distinct modes of manipulation of rice auxin response factor OsARF17 by different plant RNA viruses for infection**

Hehong Zhang, Lulu Li, Yuqing He, Qingqing Qin, Changhai Chen, Zhongyan Wei, Xiaoxiang Tan, KailiXie, Ruifang Zhang, Gaojie Hong, Jing Li, Junmin Li, Chengqi Yan, Fei Yan, Yi Li, Jianping Chen and Zongtao Sun

Corresponding Author: Zongtao Sun

Email: sunzongtao@nbu.edu.cn

Corresponding Author: Jianping Chen

Email: jpchen2001@126.com

This PDF file includes:

Supplementary Materials and Methods

Figs.S1-S15

Table S1-S2

References for SI reference citations

## Materials and methods

**Plant materials and treatments.** Rice seeds of Wuyujing No.3 were used for this study. The SP8 transgenic plants expressing the SRBSDV P8 protein were in the rice cultivar Nipponbare (*O. sativa* L. subsp. *japonica*, cv. NIP) background, while plants overexpressing OsARF17 and the OsARF17 mutant plants used Zhonghua 11 (ZH11) seedlings as the background. RBSDV-infected plants were obtained from fields in Shandong Province, China. The SRBSDV- infected plants were gifts from Prof. Guohui Zhou and RSV-infected plants were obtained from Prof. Yijun Zhou. To check the auxin responsiveness of SP8 transgenic plants, the shoots of vigorous seedlings were immersed in 0.1  $\mu\text{M}$  1-Naphthaleneacetic acid (NAA, Sigma-Aldrich) or 0.1  $\mu\text{M}$  2, 4-Dichlorophenoxyacetic acid (2, 4-D, Sigma- Aldrich) for 10-days in darkness. Images were taken after 10 days treatment, and the primary root lengths were measured. The experiments were repeated three times with similar results. All other plants were grown in the greenhouse at 28-30 °C with a 14h-light/10h-light/dark cycle.

**Total RNA extraction and qRT-PCR assays.** Total RNA was extracted from rice leaves using the TRIzol reagent (Invitrogen, Carlsbad, CA, USA) according to the manufacturer's protocol. First-strand cDNA was synthesized using the fast quant RT kit (Tiangen, Beijing, China). The qRT-PCR analysis was performed using the ChamQ™ SYBR qPCR Master Mix (Low ROX Premixed) by the ABI7900HT Sequence Detection System (Applied Biosystems, Carlsbad, CA, USA). The housekeeping gene OsUBQ5 (AK061988) was used to normalize the statistic (1). The mRNA expression levels were calculated by the  $2^{-\Delta\Delta C(t)}$  method (2). The experiments were repeated at least three times with similar results. Each biological sample consisted of 10 to 12 pooled plants. The qRT-qPCR primers used in this study are listed in Table S1.

**Western blot analysis.** SRBSDV-, RBSDV- and RSV- infected rice leaves at 30 dpi were extracted with SDS lysis buffer for western blot analysis as previously described (3). Anti-P10 polyclonal antibody (provided by Prof. Jianxiang Wu) was used to test for SRBSDV/RBSDV infection and an anti-RSV-CP polyclonal antibody produced in our laboratory was used for diagnosis of RSV.

**Insect vectors and virus inoculation assay.** SRBSDV is mainly transmitted by the white-backed planthopper (*Sogatella furcifera*, WBPH), RBSDV and RSV are transmitted by the small brown planthopper (*Laodelphax striatellus*, SBPH), while RSMV is transmitted by leafhoppers (4). The transmission experiments were done as described previously with some minor modifications (5, 6). Briefly, SBPH carrying RBSDV or RSV were transferred to rice seedlings at the 3 to 4-leaf stage (about three viruliferous insects per seedling) for 3 days. The insects were then completely removed. SRBSDV inoculation assays were similar but used 2-3-leaf rice seedlings infested with nymphs either carrying SRBSDV or virus-free (7). For RSMV inoculation assays, leafhoppers carrying RSMV were placed on seedlings at the 3 to 4-leaf stage for 3 days. The inoculated plants were grown in the greenhouse to observe symptoms. In each experiment, there were negative controls using the same number of virus-free insects. Plants infected with SRBSDV/RBSDV were stunted and had darkened leaves, RSV-infected plants had necrotic stripes and stunting and the leaves of RSMV-infected plants had yellow stripes and mosaic or twisting symptoms. The infected-plants were tested at 30 dpi by RT-PCR and western blotting. The specific primers used to detect (SRBSDV, RBSDV, RSV and RSMV) are listed in Table S1. The number of infected plants was determined following RT-PCR to calculate the viral incidence. The experiments were repeated at least three times with similar results.

**Vector construction and plant transformation.** To generate transgenic

plants over-expressing OsARF17, the full-length ORF of OsARF17 was inserted into the pCV1300 vector, driven by the 35S promoter. The recombinant plasmid was introduced into *Agrobacterium tumefaciens* strain GV3101 and transformed into rice ZH11 background as described previously (5). The primers used are listed in Table S1.

**Yeast Two-Hybrid (Y2H) and Three-Hybrid (Y3H) Assays.** The rice cDNA library for Y2H assays were generated by cloning cDNA synthesized from the rice mRNAs to the prey vector pGADT7. The library was screened using each of the viral proteins of SRBSDV as the baits in vector pGBKT7. Yeast transformation and screening were done as described in the manufacturer's instructions with some modification (Clontech; Mountain View, CA, USA). Firstly, these bait vectors were introduced into the AH109 yeast strain for autoactivation verification. The full-length cDNA library was transformed into AH109 yeast strain, which contained the viral proteins of pGBKT7 bait plasmid. The sequences were analyzed by BLASTn (NCBI database). The bait and prey vectors were constructed by PCR using the listed primers (Table S1). Different combinations of plasmids were transformed into yeast strain AH109. The transformants were cultivated on an SD/-Leu/-Trp (SD-L-T) medium and then transferred to SD/-Leu/-Trp-His-Ade (SD-L-T-H-Ade) selection medium for the interaction test. Yeast cells were photographed after 3 days of incubation at 30°C. All experiments were repeated three times with similar results. For Y3H assays, the full-length CDS sequences of OsIAA20 and CTD<sup>OsARF17</sup> (the CTD domain of OsARF17) were ligated into the pBridge vector (Clontech), to express DNA binding domain fusion proteins. *SP8* was cloned into the same pBridge vector which contained the *MET25* promoter to drive transcription. Y3H assays were based on the manufacturer's protocol (Takara, Japan) and the different combinations were co-transformed into the yeast strain AH109. The transformants were cultivated on an SD-L-T medium and then transferred to liquid SD/-Trp/-Leu media overnight until the liquid

became turbid. The yeast was diluted (1:100) in liquid SD-L-T-H-Met media and then different concentrations of Met were added. Beta-Galactosidase enzyme activity was then determined according to the protocol (Takara, Japan). Dilutions of suspended yeast (Five microliters) were plated on SD/-T/-L/-H-Ade and SD-L-T-H-Met solid media. Yeast cells were observed after 3 days incubation at 30°C. The experiments were repeated at least three times with similar results.

**Co-IP.** *N. benthamiana* leaves (five-week-old) were transformed by agro-infiltration with the following combinations: OsARF17-MYC/SP8-FLAG, GFP-MYC/SP8-FLAG (as a negative control), CTD-MYC/SP8-FLAG, DBD-MYC/SP8-FLAG, OsARF17-MYC/P2-FLAG, OsARF17-MYC/GFP-FLAG (as a negative control), DBD-MYC/P2-FLAG, CTD-MYC/P2-FLAG and OsARF17-MYC/M-FLAG. The vectors were constructed by ligation-independent cloning using the primers listed in Table S1. 72 hours after agro-infiltration, the leaves were ground in liquid nitrogen and extracted using IP lysis buffer (Thermo Scientific, Cat. no. 87788) with 1 g samples in a 1ml reaction solution with the addition of 10 mM DTT, a protease inhibitor cocktail (Roche, Switzerland). After maintaining them at 4°C for 10 min, the mixtures were centrifuged at 1,000g for 20 min, and the supernatant was then incubated with 20  $\mu$ l Pierce<sup>TM</sup> anti-c-Myc magnetic beads (Thermo Scientific, USA) or anti-FLAGM2 beads (Sigma-Aldrich, USA) for 2-3 h at 4°C. The beads had been pre-washed three times with 1 $\times$ PBS. The immunoprecipitates were then washed four times with 1 $\times$ PBS and resuspended in 80  $\mu$ L 2 $\times$ SDS-PAGE sample buffer (500 mM Tris-HCl, pH=6.8, 50% glycerin, 10% SDS, 1% bromophenol blue and 2%  $\beta$ -mercaptoethanol). Subsequently, the protein samples were boiled at 95 °C for 10 min and separated on a 10% SDS-PAGE gel for western blotting analysis.

***In vitro* pull-down assays.** The full-length SP8 protein was constructed into

pCold-TF-His vector and expressed as a recombinant His-SP8 fusion protein. The recombinant His-SP8 and His-TF (Trigger Factor) proteins were purified from *E. coli*. The OsARF17 CTD domain was constructed into pGEX6P1 and pET28a-HMT vector to form glutathione-S-transferase (GST)-tagged GST-CTD and His-CTD, respectively. The recombinant proteins were expressed in *E. coli*. Primers used for the constructs are listed in Table S1. Protein expression was induced by 0.8 mM IPTG. The supernatant containing target protein after sonication was incubated with 20  $\mu$ L glutathione (GST) sepharose beads (Thermo Scientific) or Beaver Beads™ His-tag Protein Purification beads for 1 h at 4 °C, and then washed to remove the non-specifically bound proteins. For interaction pull-down assays, the purified His-SP8 and OsARF17-MYC or GFP-MYC proteins (transiently expressed in *N. benthamiana* cells) were incubated with Myc magnetic beads at 4°C for 2h. For competitive assays, 10  $\mu$ g GST-CTD was mixed with 0, 2, 10 or 20  $\mu$ g His-SP8 or 20  $\mu$ g of His-TF was mixed with 10  $\mu$ g His-CTD and then incubated and immobilized onto glutathione GST sepharose beads at 4°C for 2 h. The beads were centrifuged at 5000g for 1 min and washed four times with 1 $\times$  PBS. The proteins bound onto beads were separated by SDS-PAGE.

**BiFC assays.** For BiFC assays, the full-length SP8 and OsARF17 were cloned into either the N-terminus of YFP or the C terminus of YFP to generate nYFP-SP8 and OsARF17-cYFP vectors. Primers used are listed in Table S1. The constructs were then transiently expressed in *N. benthamiana* cells using *Agrobacterium* strain GV3101. After incubation for 48-72 h, the YFP fluorescence was observed using a confocal laser microscopy (Leica TCS SP10). YFP was excited with 488 nm and its emissions were detected at 500 to 542 nm. Three biological repeats were conducted with similar results.

**Electrophoretic mobility shift assays.** For protein purification, the full-length CDS of P2 was cloned into the pET28a vector to express MBP-tagged fusion

protein MBP-P2. Because the solubility of the DBD domain protein of OsARF17 was very low, the shortest functional domain was inserted into the pCold-TF vector to express His-tagged fusion protein His-DBD. The pET28a-P2 and pCold-DBD vectors were transferred into *E. coli* strain DE3, with the empty pET28a and pCold-TF vectors used as the corresponding negative controls. Protein expression was induced by 0.8 mM IPTG. EMSAs were performed using the Light Shift Chemiluminescent EMSA kit following the manufacturer's instructions (Thermo Scientific, Cat. no. 20148). The AuxREs probes (50 nt) in the promoter of OsGH3.5 were labeled using Digoxigenin (DIG). The biotin-labeled probes were used as the hot probes and the unlabeled probes as competition probes for assays. For interference assays, equal amounts (10  $\mu$ g) His-DBD were mixed with 0, 1 or 10  $\mu$ g MBP-P2, or 10  $\mu$ g of MBP was used alone. The primers used are listed in Table S1.

**FRET-FLIM Measurements.** The full-length OsARF17 and SP8 were inserted respectively into PCV-Ven and PCV-Tur to express them fused to Yellow Fluorescent Protein (YFP) as mVenus Ven-OsARF17 or to Cyan Fluorescent Protein (CFP) as mTurquoise mTur-SP8. They were expressed in *N. benthamiana* epidermal cells and the fluorescence lifetime of CFP- (donor) was experimentally measured in the absence and presence of the YFP-(acceptor) using a confocal laser scanning microscope. FRET-FLIM measurements were conducted as previously described (8). Fluorescence lifetime of the donor was measured in the presence and absence of the acceptor. FRET efficiency (E) was calculated by comparing the lifetime of the donor in the presence ( $\tau_{DA}$ ) or absence ( $\tau_D$ ) of the acceptor:  $E=1- (\tau_{DA})/ (\tau_D)$  (8). The mean lifetime data are listed in Table S2. Values shown are the means  $\pm$  SD of 3 biological replicates. Significant differences were identified using Fisher's least significant difference tests. \*\*at the top of columns indicates significant difference at  $p \leq 0.01$ .

**Dual Luciferase Assays.** For the transcriptional activity assays, the full-lengths of OsARF18, SP8, or P2 were cloned into the PCV-BD vectors as effectors and the empty PCV-BD was used as the negative control. The promoter of 5\**gal* was used to drive the firefly luciferase gene (LUC) as a reporter and the Renillia luciferase (*REN*) reporter gene controlled by Cauliflower mosaic virus promoter (35S) was the reference. The BD domain can bind to the 5\**gal* promoter. GV3101 strains harboring the combinations of effectors and reporters were transformed into *N. benthamiana* leaves for 72 h. For interference in dual-LUC assays, the OsARF17-MYC and P2-FLAG were used as effectors, and the promoter region of *OsGH3.5* (500bp) was ligated into the pGREENII0800-LUC vector as reporter. The *Renilla* LUC (*REN*) gene of pGREENII0800-LUC was used as a control. Agrobacterium infiltration of tobacco was performed as above. The dual-LUC assays were performed using the Luciferase Reporter Assay System (Promega, Madison, WI) following the manufacturer's instructions. The relative luciferase activity was analyzed used LUC/*REN* ratios. For each assay, three biological repeats were conducted with similar results. The primers used for these constructs are listed in Table S1.

**Statistical Analysis.** Differences were analyzed using a one-way or two-way ANOVA with Fisher's least significant difference tests. A *p*-value  $\leq 0.05$  was considered statistically significant. All analyses were performed using ORIGIN 8 software.

**Accession numbers:** Sequence data from this study can be found in the rice genome annotation project database under the following accession numbers:

*OsARF1*, Os01g13520; *OsARF2*, Os01g48060; *OsARF3*, Os01g54990;  
*OsARF4*, Os02g04810; *OsARF5*, Os02g04810; *OsARF6*, Os02g06910;  
*OsARF7*, Os02g35140; *OsARF8*, Os02g41800; *OsARF9*, Os04g36054;  
*OsARF10*, Os04g43910; *OsARF11*, Os04g56850; *OsARF12*, Os04g57610;  
*OsARF13*, Os04g59430; *OsARF14*, Os05g43920; *OsARF15*, Os05g48870;



*OsARF16*, Os06g09660; *OsARF17*, Os06g46410; *OsARF18*, Os06g47150;  
*OsARF19*, Os06g48950; *OsARF20*, Os07g08520; *OsARF21*, Os08g40900;  
*OsARF22*, Os10g33940; *OsARF23*, Os11g32110; *OsARF24*, Os12g29520;  
*OsARF25*, Os12g41950; *OsIAA20*, Os06g07040;

**Figs. S1-S15**

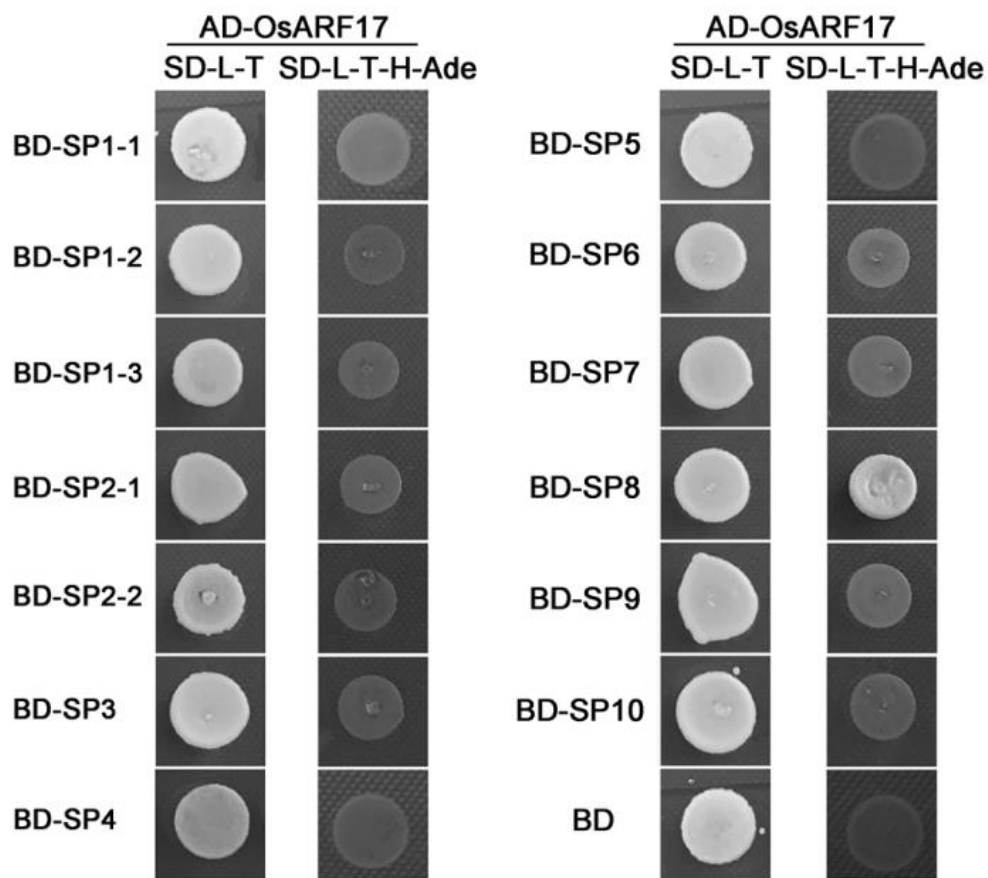

**Fig. S1. Yeast two-hybrid (Y2H) assays showing that OsARF17 only interacted with SP8 and not with other SRBSDV proteins.** The different combinations of constructs transformed into yeast cells were grown on selective media SD-L-T and interactions were tested with SD-L-T-H-Ade. Pictures were taken after 3 days of incubation at 30°C.

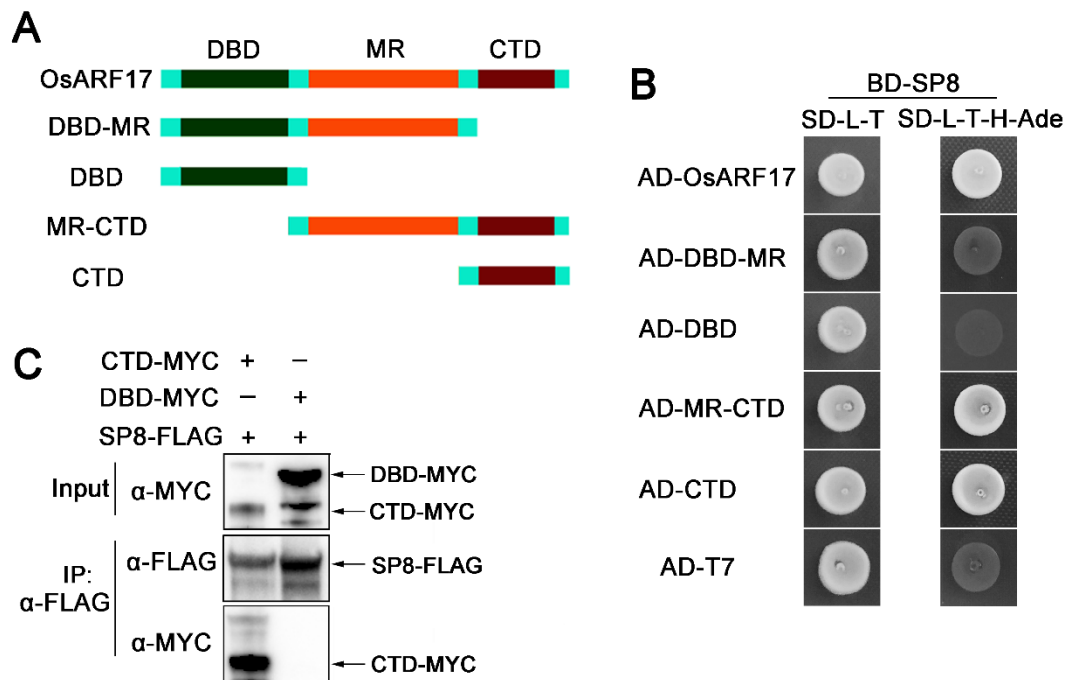

**Fig. S2. SP8 protein interacts with the CTD domain of OsARF17.** (A) Schematic diagram of the full-length and a series of OsARF17 truncated mutants constructed. DBD: DNA-binding domain; MR: middle region; CTD: carboxy-terminal dimerization domain. Dark green rectangles represented DBD domain. Orange rectangles represented MR domain. Dark red rectangles represented CTD domain. (B) The CTD domain of OsARF17 was required for binding to SP8 by Y2H assays. The different combinations of constructs transformed into yeast cells were grown on selective media SD/-Trp/-Leu (SD-L-T) and interactions were tested with SD/-Trp/-Leu/-His/-Ade (SD-L-T-H-Ade). Pictures were taken after 3 days of incubation at 30°C. (C) Co-IP assays confirm that the CTD domain was required for the SP8-OsARF17 interaction *in vivo*. Total proteins were extracted and immunoprecipitated using anti-FLAG magnetic beads. The coimmunoprecipitated proteins were detected by anti-MYC antibody. SP8 interacts with the CTD domain, but not with the DBD domain.

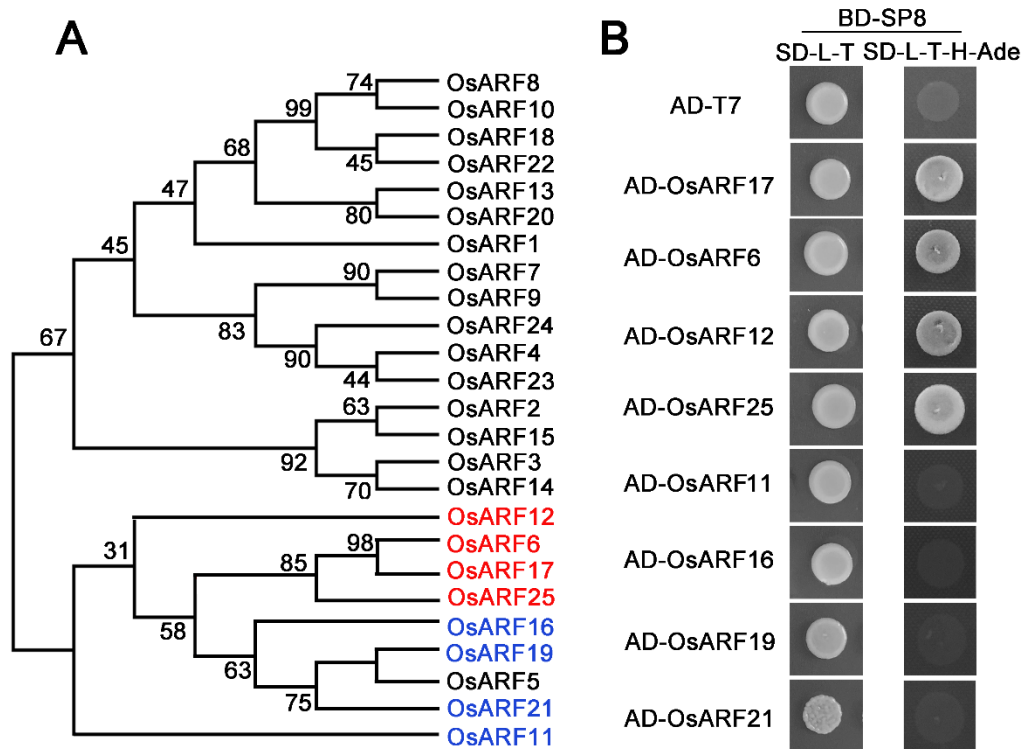

**Fig. S3.** (A) Phylogenetic analysis of the ARF proteins in the rice genome. The phylogenetic tree was drawn with Mega5.0 software. The red font and the blue font represent interaction and non-interaction with SP8 in B, respectively. (B) Y2H assay to assess the interaction of SP8 with other OsARFs (OsARF6, OsARF12, OsARF25, OsARF11, OsARF16, OsARF19 and OsARF21). Only OsARF6, OsARF12 and OsARF25 interacted with SP8.

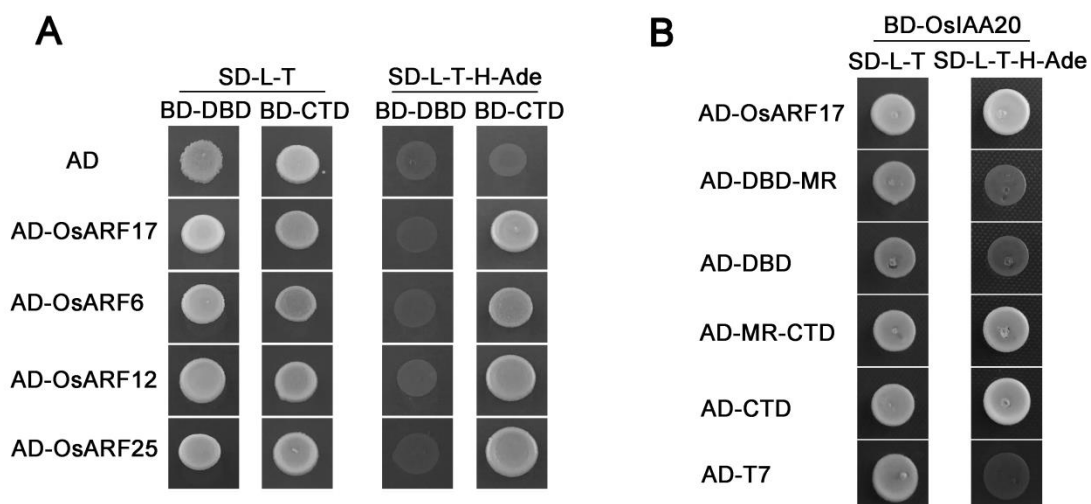

**Fig.S4.** (A) Y2H experiments confirmed that OsARF17 could form self-dimers (OsARF17) or heterodimers (OsARF6, OsARF12 and OsARF25) through its CTD domain, but not by the DBD domain. BD-DBD: DBD domain of OsARF17 cloned into pGBKT7 vector. BD-CTD: CTD domain of OsARF17 cloned into pGBKT7 vector. The different combinations of transformed yeast cells were grown on SD-L-T-H-Ade selective media to test the interaction. (B) Y2H assays showing that the CTD domain of OsARF17 was required for the interaction between OsARF17 and OsIAA20. The interactions were examined on SD-L-T-H-Ade selective media. Photos were taken after 3 days of incubation at 30°C.

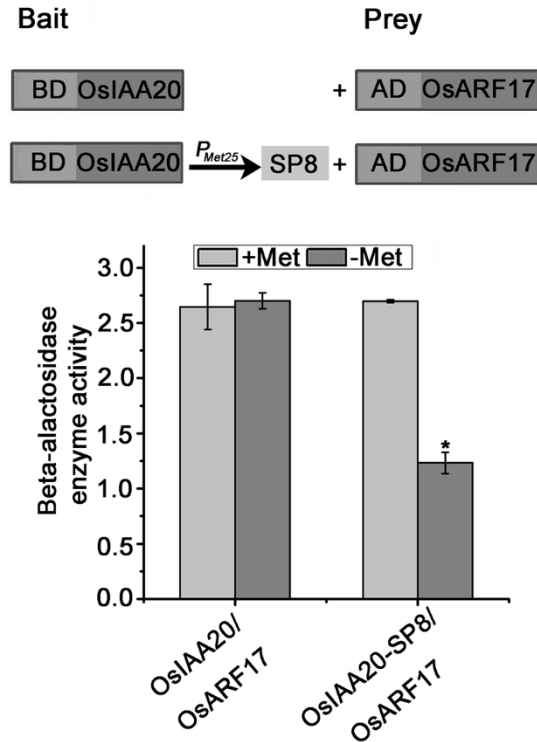

**Fig.S5. The effect of SP8 on the OsARF17-OsIAA20 interaction.** Upper panel: schematic diagrams of the bait and the prey vectors used in Y3H assays. OsIAA20 was ligated into the pBridge vector as the bait, and the expression of SP8 was driven by the methionine inducible *Met25* promoter. OsARF17 was cloned into pGADT7 vectors as prey. Lower panel: yeast cells harboring bait and prey vectors were grown on selective media SD-L-T for 3 days. The yeast cells were shaken with SD-L-T-H-Ade or SD/-Trp/-Leu/-His/-Met liquid selective media.  $\beta$ -Galactosidase enzyme activity was measured with or without SP8.

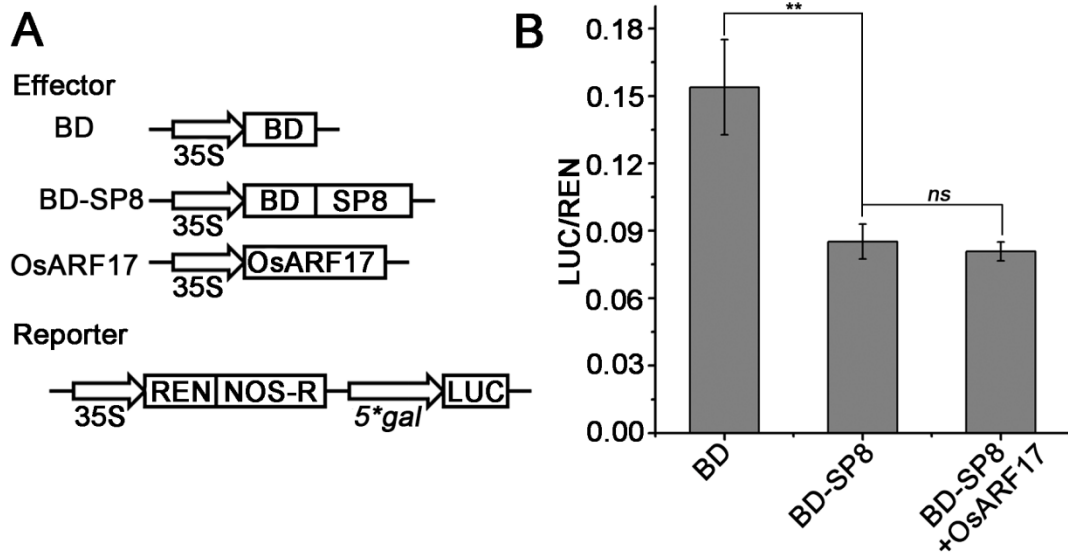

**Fig.S6. OsARF17 did not affect the repressor activity of SP8. (A)** Schematic diagrams of the effectors and reporters used in the dual-luciferase assays. The effectors: BD, SP8-BD and OsARF17 fused with MYC-tag. The reporters: 35S: REN-NOS-R/5\*gal pro:LUC plasmids. BD domain could bind the 5\*gal promoter. **(B)** The relative LUC activities were measured in *N. benthamiana* cells using the combinations shown in (A). The LUC activity significantly decreased in presence of GD-SP8 compared with the empty effector GD. The empty GD effector was used as a negative control. The LUC activity of GD-SP8 was not obviously different when GD-SP8 was expressed alone or with OsARF17. The LUC/REN ratio represents the relative LUC activity. Values shown are the means  $\pm$  SD of 3 biological replicates. Significant differences were identified using Fisher's least significant difference tests. \*\*at the top of columns indicates significant difference at  $p \leq 0.01$ . ns, no significant difference.

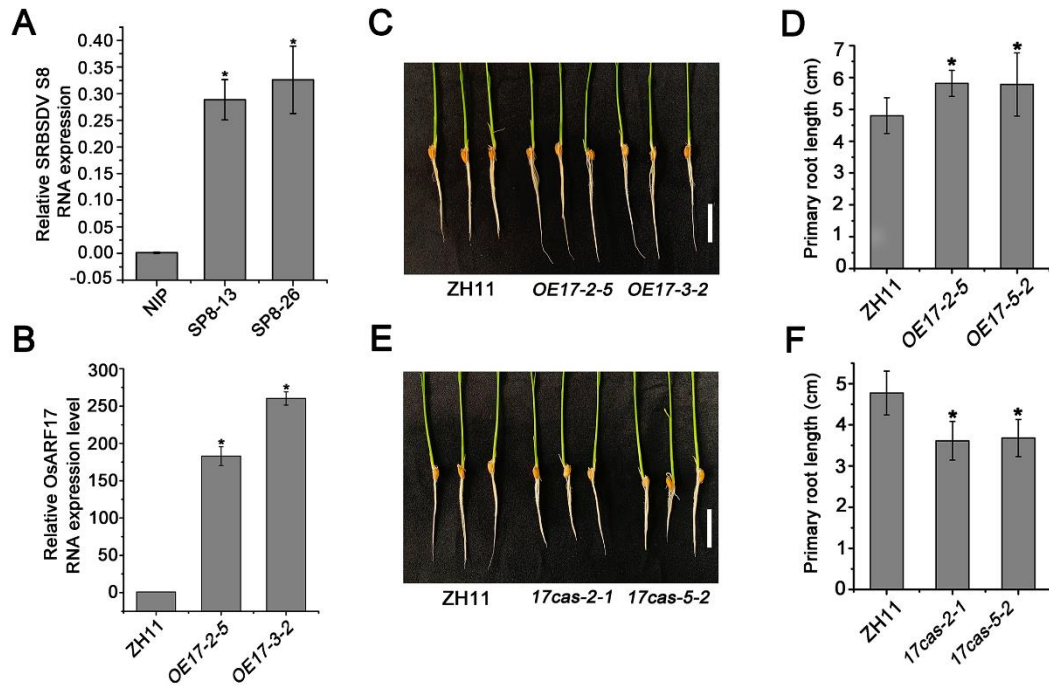

**Fig.S7. Identification of *SP8* and *OE17* transgenic plants.** (A) The relative expression levels of the SRBSDV S8 gene to housekeeping gene OsUBQ5 in control NIP, *SP8-13* and *SP8-26* plants. (B) The relative expression levels of OsARF17 gene in control ZH11, *OE17-2-5* and *OE17-3-2* plants. (C) Morphology of the primary roots of WT and transgenic seedlings overexpressing OsARF17 after normal nutrition for 10 days. Scale bars: 2 cm. (D) Statistical analyses of *OE17-2-5* and *OE17-3-2* primary root length. (E) Morphology of WT and 17cas (*17cas-2-1* and *17cas-5-2*) mutant plants primary roots under normal nutritional solution for 10 days. Scale bars: 2 cm. (F) Statistical analyses of *17cas-2-1* and *17cas-5-2* primary root lengths. Values shown are the means  $\pm$  SD of 3 biological replicates. Significant differences were identified using Fisher's least significant difference tests. \*at the top of columns indicates significant difference at  $p \leq 0.05$ .



**A**

|                  |                                                                                                    |
|------------------|----------------------------------------------------------------------------------------------------|
| WT               | CCCCAATTATCCTAACTTGCCTCCACAACCTTATTGCCAACCTCACAATGTGACGATGCATGTAAGTTTAGAGAACATCTTTTTTCGTTCCAGAGCCA |
| <i>17cas-2-1</i> | CCCCAATTATCCTAACTTGCCTCCACAACCTTATTGCCAACCT-ACAATGTGACGATGCATGTAAGTTTAGAGAACATCTTTTTTCGTTCCAGAGCCA |
| <i>17cas-5-2</i> | CCCCAATTATCCTAACTTGCCTCCACAACCTTATTGCCAACCT-ATGTGACGATGCATGTAAGTTTAGAGAACATCTTTTTTCGTTCCAGAGCCA    |

TC deletion  
TCACA deletion

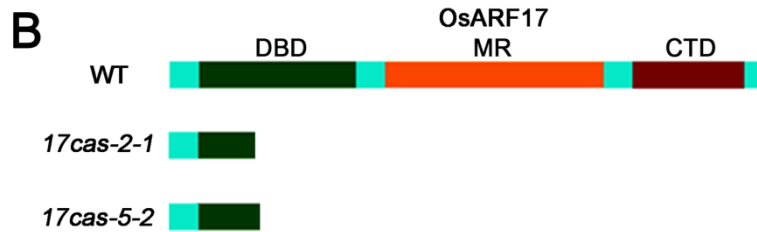

**Fig.S8. The mutations of OsARF17 inserted into rice plants. (A)** The mutants of OsARF17 with the nucleotide deletions in the T3 generation are showed by red letters. Dark green rectangles represent the DBD domain of OsARF17, orange rectangles are the MR domain and dark red rectangles are the CTD domain. **(B)** The two or five nucleotide deletions in *17cas-2-1* or *17cas-5-2* plants result in premature stop codons. Three complete domains of OsARF17 were truncated. DBD: DNA-binding domain; MR: middle region; CTD: carboxy-terminal dimerization domain.

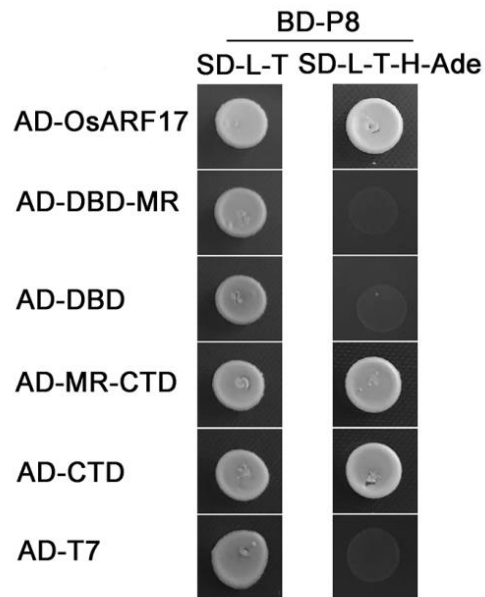

**Fig.S9. Y2H assays showing that RBSDV P8 protein also interacted with OsARF17 and that the CTD domain of OsARF17 was required for the interaction.** The interactions were examined with SD-L-T-H-Ade selective media. Photos were taken after 3 days of incubation at 30°C.

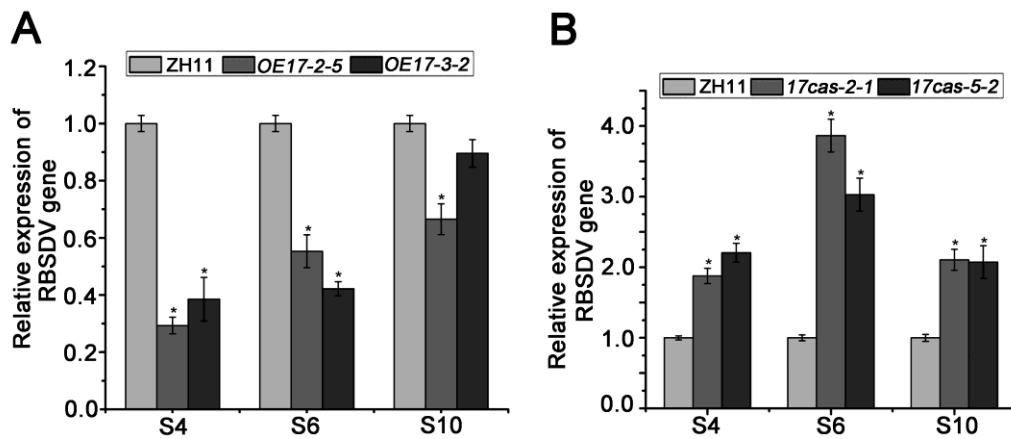

**Fig.S10. Effect of OsARF17 on RBSDV infection.** (A) qRT-PCR results showing the relative expression levels of RBSDV S4, S6 and S10 gene in virus infected *OE17-2-5* and *OE17-3-2* plants compared with the RBSDV-infected non-transformed ZH11 controls at 30 dpi. (B) The relative expression level of RBSDV S4, S6 and S10 genes in virus-infected *17cas-2-1* and *17cas-5-2* plants compared with RBSDV-infected ZH11 plants. Values shown are the means  $\pm$  SD of 3 biological replicates. Significant differences were identified using Fisher's least significant difference tests. \*at the top of columns indicates significant difference at  $p \leq 0.05$ .

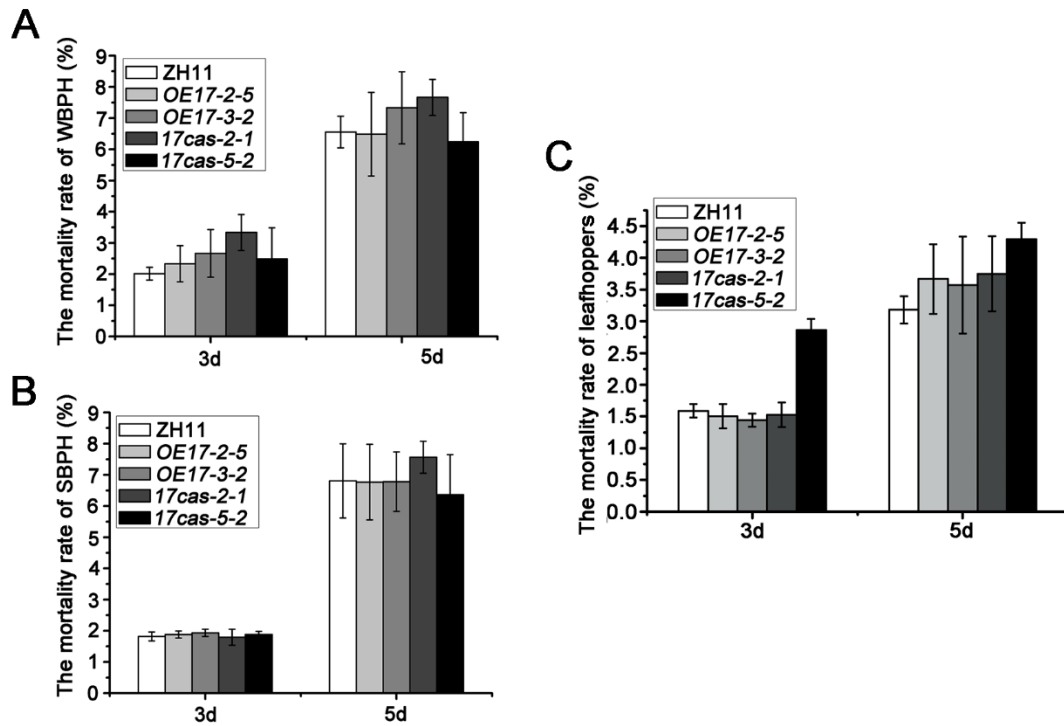

**Fig.S11. The mortality rate of white-backed planthoppers (WBPH), small brown planthoppers (SBPH) or leafhoppers on control (ZH11) and transgenic plants.** Ten-day-old seedlings of OsARF17-related transgenic lines were infested with virus-free WBPH (A), SBPH (B) or leafhoppers (C) at 6 insects per seedling for 5 days and insect survival was counted at 3 and 5 days. Each treatment had at least 60 insects. Values shown are the means  $\pm$  SD of 3 biological replicates. Significant differences were identified using Fisher's least significant difference tests.

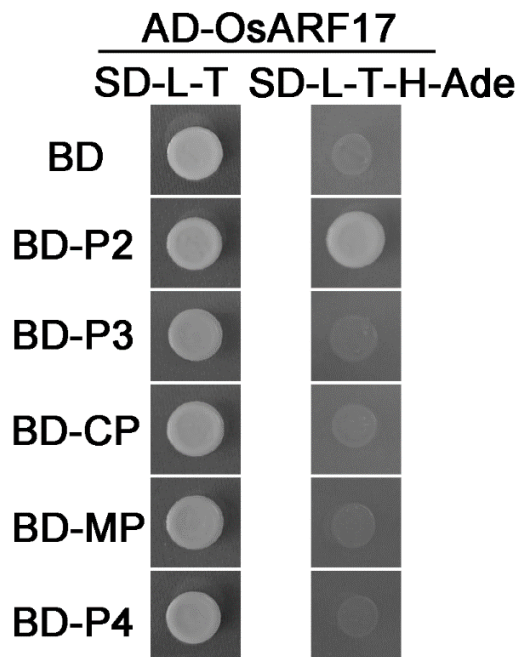

**Fig.S12. Y2H assays showing that OsARF17 interacts with RSV P2, but not with other RSV proteins.** The different combinations of constructs transformed into yeast cells were grown on selective media SD-L-T and interactions were tested with SD-L-T-H-Ade. Pictures were taken after 3 days of incubation at 30°C.

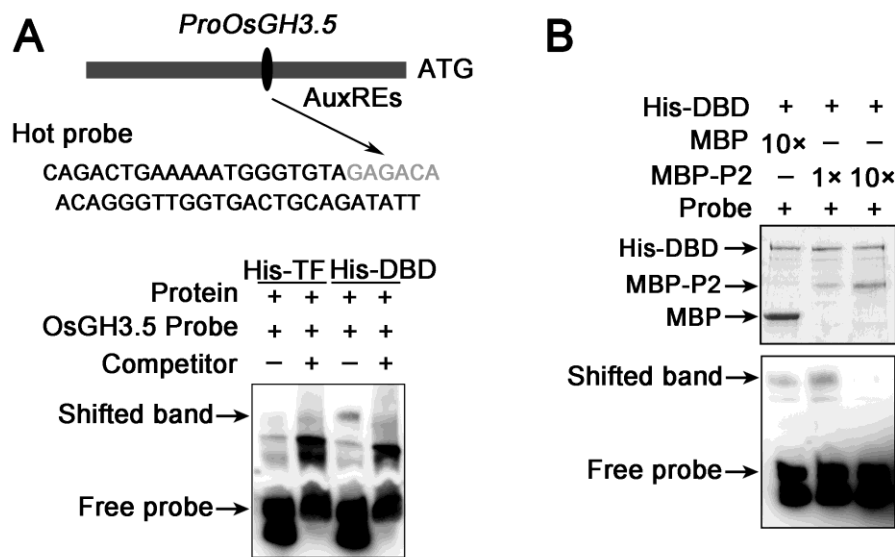

**Fig.S13. P2 interferes with the ability of OsARF17 to bind to the promoter of *OsGH3.5 in vitro*.** (A) Schematic diagrams of the *OsGH3.5* promoters. The positions of AuxREs motif DNA binding sites are shown as a black ellipse. The DIG-labeled probes were used for EMSA and the grey letters indicated by the arrows are the binding sites. EMSA assays confirmed that OsARF17 directly bound the AuxREs of the *OsGH3.5* promoter. (B) EMSA assays showing that with increasing amounts of MBP-P2 fusion protein, the DNA binding activity of OsARF17 significantly decreased. Equal amounts of His-DBD proteins and probes were used; 10x indicate the excess amount of MBP-P2 relative to initial amount. MBP protein was the negative control.

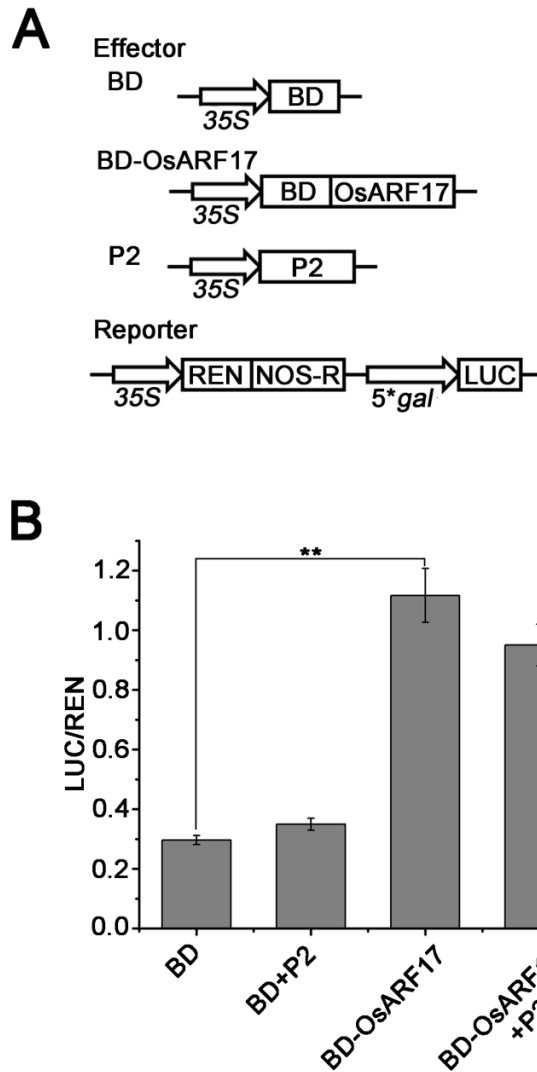

**Fig.S14. P2 has no effect on the transcriptional activity of OsARF17.** (A) Schematic diagrams of the effectors and reporters used in the dual-luciferase experiments. The effectors: BD, OsARF17-BD and P2 fused with FLAG-tag. The reporters: 35S: REN-NOS-R/5\*gal pro:LUC plasmids. BD domain could bind the 5\*gal promoter. (B) The relative LUC activities were measured in *N. benthamiana* cells using the combinations displayed in (A). The LUC/REN ratio represents the relative LUC activity. Values shown are the means  $\pm$  SD of 5 biological replicates. Significant differences were identified using Fisher's least significant difference tests. \*\*at the top of columns indicates significant difference at  $p \leq 0.01$ .

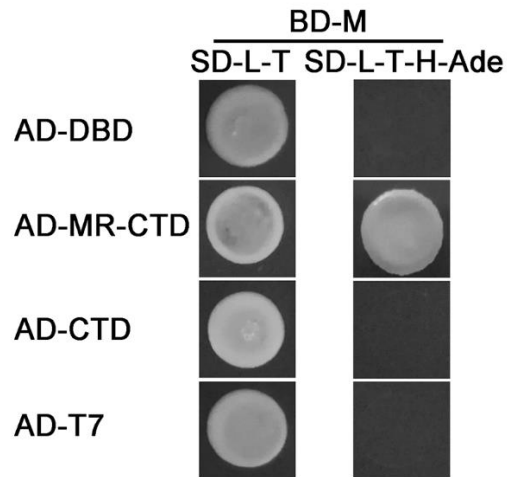

**Fig.S15. RSMV M protein interacts with the MR-CTD domain of OsARF17 in Y2H assays.** The different combinations of constructs transformed into yeast cells were grown on selective media SD/-Trp/-Leu (SD-L-T) and interactions were tested with SD/-Trp/-Leu/-His/-Ade (SD-L-T-H-Ade). Pictures were taken after 3 days of incubation at 30°C.



Table S1 The primers used in this study.

| Gene Name                                | Primer Name                                 | Sequence 5'-3'                                |                                                 |
|------------------------------------------|---------------------------------------------|-----------------------------------------------|-------------------------------------------------|
| <b>For Yeast Two-Hybrid (Y2H) Assays</b> |                                             |                                               |                                                 |
| OsARF homologues                         | AD-OsARF17-F                                | GACGTACCAGATTACGCTCATATGATGAGGCTTTCGTCGTCGT   |                                                 |
|                                          | AD-OsARF17-R                                | GCAGCTCGAGCTCGATGGATCCTTAGAATTCAACTGAGCCGAC   |                                                 |
|                                          | AD-OsARF6-F                                 | GACGTACCAGATTACGCTCATATGATGAAGCTCTCGCCGTCG    |                                                 |
|                                          | AD-OsARF6-R                                 | GCAGCTCGAGCTCGATGGATCCTTAGAACTCAACTGAGCCCACC  |                                                 |
|                                          | AD-OsARF12-F                                | GACGTACCAGATTACGCTCATATGATGAGCTCGTCGTCGGCG    |                                                 |
|                                          | AD-OsARF12-R                                | GCAGCTCGAGCTCGATGGATCCTTAGGACAGATACCGTGGATCAT |                                                 |
|                                          | AD-OsARF25-F                                | GACGTACCAGATTACGCTCATATGATGAAGCTCTCTCCGCCG    |                                                 |
|                                          | AD-OsARF25-R                                | GCAGCTCGAGCTCGATGGATCCTTAGTAGTCCAGAGGCGCTACA  |                                                 |
|                                          | AD-OsARF11-F                                | GACGTACCAGATTACGCTCATATGATGGCGTCTCGCAGGAG     |                                                 |
|                                          | AD-OsARF11-R                                | GCAGCTCGAGCTCGATGGATCCTTAAGCTGCTTGAATACAGTCGT |                                                 |
|                                          | AD-OsARF16-F                                | GACGTACCAGATTACGCTCATATGATGAAGGATCAGGGATCATC  |                                                 |
|                                          | AD-OsARF16-R                                | GCAGCTCGAGCTCGATGGATCCTTAACCTCTCCATGCATTTG    |                                                 |
|                                          | AD-OsARF19-F                                | GACGTACCAGATTACGCTCATATGATGATGAAGCAGGCGCAGA   |                                                 |
|                                          | AD-OsARF19-R                                | GCAGCTCGAGCTCGATGGATCCTTACGCAGTATTCCAATACCT   |                                                 |
|                                          | AD-OsARF21-F                                | GACGTACCAGATTACGCTCATATGATGGCGAGCTCCGGCCG     |                                                 |
|                                          | AD-OsARF21-R                                | GCAGCTCGAGCTCGATGGATCCTTAGTCGCCG GTTATCCT     |                                                 |
|                                          | OsARF17 truncated mutants                   | AD-DBD-MR-F                                   | GACGTACCAGATTACGCTCATATGATGAGGCTTTCGTCGTCGT     |
|                                          |                                             | AD-DBD-MR-R                                   | GCAGCTCGAGCTCGATGGATCCTTATTGCATTAGAAGTGACTGTGAA |
| AD-DBD-F                                 |                                             | GACGTACCAGATTACGCTCATATGATGAGGCTTTCGTCGTCGT   |                                                 |
| AD-DBD-R                                 |                                             | GCAGCTCGAGCTCGATGGATCCTTATACACTTGACTCTTCTGT   |                                                 |
| AD-MR-F                                  |                                             | GACGTACCAGATTACGCTCATATGATGACAGAAGAGTCAAGTGTA |                                                 |
| AD-CTD-F                                 |                                             | GACGTACCAGATTACGCTCATATGATGTTGGCGTTAACATAGATT |                                                 |
| AD-CTD-R                                 |                                             | GCAGCTCGAGCTCGATGGATCCTTAGAATTCAACTGAGCCGACAG |                                                 |
| BD-DBD-F                                 |                                             | ATCTCAGAGGAGGACCTGCATATGATGAGGCTTTCGTCGTCGT   |                                                 |
| BD-DBD-R                                 | GCCGCTGCAGGTCGACGGATCCTTATACACTTGACTCTTCTGT |                                               |                                                 |

|           |                                               |                                                  |
|-----------|-----------------------------------------------|--------------------------------------------------|
|           | BD-CTD-F                                      | ATCTCAGAGGAGGACCTGCATATGATGTTTGGCGTTAACATAGATT   |
|           | BD-CTD-R                                      | GCCGCTGCAGGTCGACGGATCCTTAGAATTCAACTGAGCCGACAG    |
| SRBSDV    | BD-SP3-F                                      | ATCTCAGAGGAGGACCTGCATATGATGCAAGACGTACAAAGGAC     |
|           | BD-SP3-R                                      | GCCGCTGCAGGTCGACGGATCCCTATGTTTTATGAAGAAGAG GT    |
|           | BD-SP4-F                                      | ATCTCAGAGGAGGACCTGCATATGATGTTGAAAG TAAATGTGCA GG |
|           | BD-SP4-R                                      | GCCGCTGCAGGTCGACGGATCCTCATTTTTTG GGATGAATTA AGA  |
|           | BD-SP5-1-F                                    | ATCTCAGAGGAGGACCTGCATATGATGACATATTTGAAAGTGAAGAT  |
|           | BD-SP5-1-R                                    | GCCGCTGCAGGTCGACGGATCCTCATCGCGCT GTAGTTGGTT      |
|           | BD-SP6-F                                      | ATCTCAGAGGAGGACCTGCATATGATGTCTACCA ACCTCACGAA    |
|           | BD-SP6-R                                      | GCCGCTGCAGGTCGACGGATCCTTACTCTGAA ATAAGTTGCCAG    |
|           | BD-SP7-1-F                                    | ATCTCAGAGGAGGACCTGCATATGATGGATAGACCTGCTCGAGA     |
|           | BD-SP7-1-R                                    | GCCGCTGCAGGTCGACGGATCCTTAAGATGATGGAGATTCAAAA     |
|           | BD-SP8-F                                      | ATCTCAGAGGAGGACCTGCATATGATGATCGGTACATACGATGAT    |
|           | BD-SP8-R                                      | GCCGCTGCAGGTCGACGGATCCTTAACACAGAATACTAACGGCG     |
|           | BD-SP9-F                                      | ATCTCAGAGGAGGACCTGCATATGATGGCAGACCTAGAGCGTA      |
|           | BD-SP9-R                                      | GCCGCTGCAGGTCGACGGATCCTCAAACGTCCAATTTAAGTGAA     |
| BD-SP10-F | ATCTCAGAGGAGGACCTGCATATGATGGCTGACATAAGACTTGAC |                                                  |
| BD-SP10-R | GCCGCTGCAGGTCGACGGATCCTCATCTGGTGACTTTATTTAAC  |                                                  |
| RSV       | BD-P2-F                                       | ATCTCAGAGGAGGACCTGCATATGATGGCATTACTCCTCTTCAAT    |
|           | BD-P2-R                                       | GCCGCTGCAGGTCGACGGATCCTTACATTAGAATAGGGCACT       |
|           | BD-P3-F                                       | ATCTCAGAGGAGGACCTGCATATGATGAACGTGTTACATCGTC      |
|           | BD-P3-R                                       | GCCGCTGCAGGTCGACGGATCCCTACAGCACAGCTGGAGAGC       |
|           | BD-CP-F                                       | ATCTCAGAGGAGGACCTGCATATGATGGGTACCAACAAGCCAG      |
|           | BD-CP-R                                       | GCCGCTGCAGGTCGACGGATCCCTAGTCATCTGCACCTTCTG       |
|           | BD-MP-F                                       | ATCTCAGAGGAGGACCTGCATATGATGGCTTTGTCTCGACTTTTG    |
|           | BD-MP-R                                       | GCCGCTGCAGGTCGACGGATCCCTACATGATGACAGAACTTC       |
| RSMV      | BD-N-F                                        | ATCTCAGAGGAGGACCTGCATATGATGGCAACCGACAAGTCTTT     |
|           | BD-N-R                                        | GCCGCTGCAGGTCGACGGATCCTTAAGCCTTGGTCTGGAAGAT      |
|           | BD-P-F                                        | ATCTCAGAGGAGGACCTGCATATGATGAGTGTGCCAGAGGATAC     |

|                                            |                      |                                                |
|--------------------------------------------|----------------------|------------------------------------------------|
|                                            | BD-P-R               | GCCGCTGCAGGTCGACGGATCCTCACAGTGCATCATCATAGTA    |
|                                            | BD-P3-F              | ATCTCAGAGGAGGACCTGCATATGATGAAGATCATCTGCAGTACT  |
|                                            | BD-P3-R              | GCCGCTGCAGGTCGACGGATCCTCAAGTAGCAAACCTTGACATG   |
|                                            | BD-M-F               | ATCTCAGAGGAGGACCTGCATATGATGGCCGTTCCGTGGACT     |
|                                            | BD-M-R               | GCCGCTGCAGGTCGACGGATCCCTAACTCCAGATTATACTTCC    |
|                                            | BD-G-F               | ATCTCAGAGGAGGACCTGCATATGATGATGAGGATTTCCGTCTTT  |
|                                            | BD-G-R               | GCCGCTGCAGGTCGACGGATCCTTAGTCACTTTCTATAGTATATTC |
|                                            | BD-P6-F              | ATCTCAGAGGAGGACCTGCATATGATGGAGTTCAATTGGCCTTG   |
|                                            | BD-P6-R              | GCCGCTGCAGGTCGACGGATCCTTAGGCATCATGCAGTACCC     |
| RBSDV                                      | BD-P8-F              | ATCTCAGAGGAGGACCTGCATATGATGACTGGCACCCATGACGA   |
|                                            | BD-P8-R              | GCCGCTGCAGGTCGACGGATCCTTATACAATAATCGAGGAAGCT   |
| <b>For Yeast Three-Hybrid (Y3H) Assays</b> |                      |                                                |
| OslAA20                                    | BD-OslAA20-F         | ATCTCAGAGGAGGACCTGCATATGATGGAGCTCGAGCTCGGC     |
|                                            | BD-OslAA20-R         | GCCGCTGCAGGTCGACGGATCCTTACACCAGTATCTTGAGCCGT   |
|                                            | pBridge-BD-OslAA20-F | GTTGACTGTATCGCCGGAATTCATGATGGAGCTCGAGCTCGGC    |
|                                            | pBridge-BD-OslAA20-R | TTAGCTTGGCTGCAGGTCGACTTACACCAGTATCTTGAGCCGT    |
| OsARF17                                    | pBridge-BD-CTD-F     | GTTGACTGTATCGCCGGAATTCATGTTTGGCGTTAACATAGATT   |
| CTD domain                                 | pBridge-BD-CTD-R     | TTAGCTTGGCTGCAGGTCGACTTAGAATTCAACTGAGCCGACAG   |
| SRBSDV P8                                  | pBridge-Met-SP8-F    | GAAGAAGAGAAAGGTGGCGCCGCATGATGATTGGCACCTATGATGA |
| protein                                    | pBridge-Met-SP8-R    | CATGGGAGATCAGCCCCAAGATCTTTAGCAAAGAATAGACACAGCT |
| <b>For Dual Luciferase Assays</b>          |                      |                                                |
| OsARF17                                    | pCV-BD-OsARF17-F     | GTTGACTGTATCGCCGGTCGACATGAGGCTTTCGTCTCGT       |
|                                            | pCV-BD-OsARF17-R     | CGATCGGGGAATTCGAGCTCTTAGAATTCAACTGAGCCGAC      |
| SRBSDV P8                                  | pCV-BD-SP8-F         | GTTGACTGTATCGCCGGTCGACATGATCGGTACATACGATGAT    |
| protein                                    | pCV-BD-SP8-R         | CGATCGGGGAATTCGAGCTCTTAACACAGAATACTAACGGCG     |
| RSV P2                                     | pCV-BD-P2-F          | GTTGACTGTATCGCCGGTCGACATGGCATTACTCCTCTTCAAT    |
| protein                                    | pCV-BD-P2-R          | CGATCGGGGAATTCGAGCTCTTACATTAGAATAGGGCACT       |
| OsGH3.5                                    | pGREEN-proOsGH3.5-F  | CTTGATATCGAATTCCTGCAGCATGCAGAGAGATGCTGAAAT     |
| promoter                                   | pGREEN-proOsGH3.5-R  | ATGTTTTTGGCGTCTTCCATGGGCTGTGAATTGTGATGTGAAG    |

| <b>For construction of overexpression vector</b> |                  |                                            |
|--------------------------------------------------|------------------|--------------------------------------------|
| OE17                                             | OE17-F           | GTTCCAGATTACGCTGGATCCATGAGGCTTTCGTCGTCGT   |
|                                                  | OE17-R           | ATCGGGGAAATTCGAGCTCTTAGAATTCAACTGAGCCGAC   |
| SP8                                              | SP8-F            | GTTCCAGATTACGCTGGATCCATGATCGGTACATACGATGAT |
|                                                  | SP8-R            | ATCGGGGAAATTCGAGCTCTTAACACAGAATACTAACGGCG  |
| <b>For RT-PCR</b>                                |                  |                                            |
| RBSDV                                            | RB-F             | AGCACTACAGATGTTACACAC                      |
|                                                  | RB-R             | GCCTGTCCCTATCAGATTTCAAC                    |
| SRBSDV                                           | SRB-F            | CGCGTCATCTCAGACTACAG                       |
|                                                  | SRB-R            | TTTGTGAGCATCTAAAGCGC                       |
| RSV                                              | RSV-CP-1F        | AGGCAATCAATGACATCTCC                       |
|                                                  | RSV-CP-1R        | ATCTCTCACAAAGCCAGTGC                       |
| RSMV                                             | RSMV-detection-F | TGCACAGACGTTAGTGAGTTAC                     |
|                                                  | RSMV-detection-R | TCCGTCTTTCATAGCCTTCAG                      |
| 17cas                                            | 17cas-F          | ACCGGGCTAAGTGGTTGTAG                       |
|                                                  | 17cas-R          | ATTTCCACAGGGTCACAGC                        |
| <b>For qRT-PCR</b>                               |                  |                                            |
| OE17                                             | qRT17-F          | GCTTTGGGAGATTGAGCCCT                       |
|                                                  | qRT17-R          | TCTCGGAGCCACATGAGAGA                       |
| SP8                                              | qRTSP8-F         | TCAGTTCTCTCGACCCACC                        |
|                                                  | qRTSP8-R         | GCCGAAACTAGCTCTCTCAC                       |
| SRBSDV                                           | qSR-S4-F         | AAAGTGAACCCGTTGCTGAC                       |
|                                                  | qSR-S4-R         | TGCAACGCTAGATCCTATGC                       |
|                                                  | qSR-S6-F         | ATCTGCTTTTCCCTCCGA                         |
|                                                  | qSR-S6-R         | GATTCCGCGTTTGAAGAGTCA                      |
|                                                  | qSR-S10-F        | ACAACATGGAGCGGAGTCT                        |
|                                                  | qSR-S10-R        | CGGTCTTACGCAACGATGAA                       |
| RBSDV                                            | qRB-S4-F         | ATTTGCGTTTTGCAATTTCC                       |
|                                                  | qRB-S4-R         | GCTCTACGACGACCAATTC                        |

|                                 |                |                                                         |
|---------------------------------|----------------|---------------------------------------------------------|
|                                 | qRB-S6-F       | AGCGTGTGAAAACGAGATC                                     |
|                                 | qRB-S6-R       | CGCTTTGCAAATTCAACAAG                                    |
|                                 | qRB-S10-F      | AACAACCGACCAACAATCAC                                    |
|                                 | qRB-S10-R      | GAGCAGGAACTTCACGACAG                                    |
| RSV                             | qRSV-CP-F      | AGGCAATCAATGACATCTCC                                    |
|                                 | qRSV-CP-R      | ATCTCTCACAAGCCAGTGC                                     |
| RSMV                            | qRSMV-N-F      | AGAGGTTGGAGAGGGGAAGA                                    |
|                                 | qRSMV-N-R      | TAGCCGCCCTTCTATCCTTG                                    |
| <b>For BiFC Assays</b>          |                |                                                         |
| OsARF17                         | OsARF17-cYFP-F | CTGTACAAGTCCGGAGTCGACATGAGGCTTTCGTCGTCGT                |
|                                 | OsARF17-cYFP-R | CGATCGGGGAAATTCGAGCTCGAATTCAACTGAGCCGAC                 |
| SRBSDV P8                       | nYFP-SP8-F     | ATCGAGGACTCCGGAGTCGACATGATCGGTACATACGATGAT              |
| protein                         | nYFP-SP8-R     | CGATCGGGGAAATTCGAGCTCTTAACACAGAATACTAACGGCG             |
| <b>For FRET-FLIM Assays</b>     |                |                                                         |
| PCV-SP8-Tur                     | mTur-SP8-F     | GGA CTCTAGACCCCTGGGATCCATGATCGGTACATACGATGAT            |
|                                 | mTur-SP8-R     | CCTCGCCCTTGCTCACCATGTGCGACACACAGAATACTAACGGCG           |
| PCV-OsARF                       | Ven-OsARF17-F  | GGA CTCTAGACCCCTGGGATCCATGAGGCTTTCGTCGTCGT              |
| 17-Ven                          | Ven-OsARF17-R  | CCTCTCCCTTGCTCACCATGTGCGACGAATTCAACTGAGCCGAC            |
| <b>For EMSA Assays</b>          |                |                                                         |
|                                 | OsGH3.5-cis-F  | CAGACTGAAAAATGGGTGTAGAGACAACAGGGTTGGTGA CTGCAGAT<br>ATT |
|                                 | OsGH3.5-cis-R  | AATATCTGCAGTCACCAACCCTGTTGTCTCTACACCCATTTTTCAGTCT<br>G  |
| <b>For protein purification</b> |                |                                                         |
| SRBSDV P8                       | pColdTF-SP8-F  | GTGGTATCGAAGGTAGGCATATGATGATCGGTACATACGATGAT            |
| protein                         | pColdTF-SP8-R  | ACAAGCTTGAATTCGGATCCTTAACACAGAATACTAACGGCG              |
| OsARF17                         | pColdTF-DBD-F  | GTGGTATCGAAGGTAGGCATATGATGTACGCTCAGATGACGCT             |
| truncated DBD<br>domain         | pColdTF-DBD-R  | ACAAGCTTGAATTCGGATCCTTAATCACTAGATAGGACTGAA              |

|                                                          |               |                                               |
|----------------------------------------------------------|---------------|-----------------------------------------------|
| OsARF17                                                  | pColdTF-CTD-F | GTGGTATCGAAGGTAGGCATATGATGTTTGGCGTTAACATAGATT |
| CTD domain                                               | pColdTF-CTD-R | ACAAGCTTGAATTCGGATCCTTAGAATTCAACTGAGCCGACAG   |
|                                                          | 6P1-CTD-F     | TCCAGGGGCCCTGGGATCCATGTTTGGCGTTAACATAGATT     |
|                                                          | 6P1-CTD-R     | GTCAGTCACGATGCGGCCGCTTAGAATTCAACTGAGCCGACAG   |
| RSV P2<br>protein                                        | pET28a-P2-F   | CTGTATTTTCAGGGCCATATGATGGCATTACTCCTCTTCAAT    |
|                                                          | pET28a-P2-R   | ACGGAGCTCGAATTCGGATCCTCACATTAGAATAGGGCACTC    |
| <b>For MYC or FLAG tags transient expression vectors</b> |               |                                               |
| MYC tagged                                               | Lic-OsARF17-F | CgACgACAAGACCgTCACCATGAGGCTTTCGTCGTCGT        |
|                                                          | Lic-OsARF17-R | gAggAgAagAgCCgTCgGAATTC AACTGAGCCGACAG        |
| FLAG tagged                                              | Lic-SP8-F     | CgACgACAAGACCgTCACCATGATCGGTACATACGATGAT      |
|                                                          | Lic-SP8-R     | gAggAgAagAgCCgTCgACACAGAATACTAACGGCG          |
|                                                          | Lic-P2-F      | CgACgACAAGACCgTCACCATGGCATTACTCCTCTTCAAT      |
|                                                          | Lic-P2-R      | gAggAgAagAgCCgTCgCATTAGAATAGGGCACT            |
| MYC tagged                                               | Lic-DBD-F     | CgACgACAAGACCgTCACCATGAGGCTTTCGTCGTCGT        |
|                                                          | Lic-DBD-R     | gAggAgAagAgCCgTCgTACACTTGACTCTTCTGT           |
|                                                          | Lic-CTD-F     | CgACgACAAGACCgTCACCATGTTTGGCGTTAACATAGATT     |
|                                                          | Lic-CTD-R     | gAggAgAagAgCCgTCgGAATTC AACTGAGCCGACAG        |
| MYC or<br>FLAG tagged                                    | Lic-GFP-F     | CgACgACAAGACCgTCACCCTGGACGGCGACGTAAAC         |
|                                                          | Lic-GFP-R     | gAggAgAagAgCCgTCgGTTGTGGCGGATCTTGAAGT         |

Table S2 FRET-FLIM assays showing that OsARF17 interacts with SP8.

| Donor    | Acceptor    | $\tau$ | $\Delta t$ | Number | E    | p-value    |
|----------|-------------|--------|------------|--------|------|------------|
| mTur-SP8 | -           | 3.9633 | -          | 30     | -    | -          |
| mTur-SP8 | Ven         | 3.9563 | 7          | 32     | 0.18 | 0.94854    |
| mTur-SP8 | Ven-OsARF17 | 3.2242 | 739        | 34     | 34.7 | 3.83403E-4 |

Mean lifetime,  $\tau$ , in ns.  $\Delta t = \tau_D - \tau_{DA}$  (in ps).  $\tau_{DA}$ , the donor in the presence of the acceptor;  $\tau_D$ , the donor in the absence of the acceptor. Number: total number of measured. % FRET efficiency:  $E = 1 - (\tau_{DA}/\tau_D)$ . p-value significant differences were identified using Fisher's least significant difference tests.

## References

1. Sun Z, He Y, Li J, Wang X, Chen J, Genome-wide characterization of rice black streaked dwarf virus-responsive microRNAs in rice leaves and roots by small RNA and degradome sequencing. *Plant Cell Physiol.* **56**, 688-699 (2015).
2. Livak KJ, Schmittgen TD, Analysis of relative gene expression data using real-time quantitative PCR and the  $2^{-\Delta\Delta CT}$  method. *Methods* **25**, 402-408 (2001).
3. Sun Z, *et al.* Rice black - streaked dwarf virus P10 induces membranous structures at the ER and elicits the unfolded protein response in *Nicotiana benthamiana*. *Virology* **447**, 131-139 (2013).
4. Hibino H, Biology and epidemiology of rice viruses. *Ann Rev Physiol* **34**, 249-274 (1995).
5. Zhang H, *et al.* Rice black-streaked dwarf virus P10 acts as either a synergistic or antagonistic determinant during superinfection with related or unrelated virus. *Mol Plant Pathol.* **20**, 641-655 (2019).
6. Yang X, *et al.* Rice stripe mosaic virus, a novel cytorhabdovirus infecting rice via leafhopper transmission. *Front. Microbiol.* **7**, 2140 (2017).
7. Zhou G, Xu D, Xu D, Zhang M, Southern rice black-streaked dwarf virus: a white-backed planthopper-transmitted *fijivirus* threatening rice production in Asia. *Front Microbiol.* **4**, 270 (2013).
8. Tasset C, *et al.* Autoacetylation of the *Ralstonia solanacearum* effector PopP2 targets a lysine residue essential for RRS1-R-mediated immunity in *Arabidopsis*. *PLoS Pathog.* **6**, e1001202 (2010).
